# Supplementary material for: Controlled synthesis, phase formation, growth mechanism, and magnetic properties of 3-D CoNi alloy microstructures composed of nanorods
Source: Royal Society of Chemistry journal article supplement (doi:10.1039/c3ce40385h), 2013-01-01
Supplement: c3ce40385h.pdf [file c3ce40385h.pdf]

## Supplementary Material (ESI) for CrystEngComm

This journal is © The Royal Society of Chemistry 2013

---

### Electronic Supplementary Information (ESI)

#### **Controlled synthesis, phase formation, growth mechanism and magnetic properties of 3-D CoNi alloy microstructures composed of nanorods**

M. Yasir Rafique, Liqing Pan<sup>\*</sup>, Waheed S. Khan, M. Zubair Iqbal, Hongmei Qiu, M.H. Farooq, Mujtiba Ellahi, Zhengang Guo

---

To whom correspondence should be addressed, Tel: 0086-717-6393358 ; Fax: 0086-717-6392370

E-mail: [lpn@ctgu.edu.cn](mailto:lpn@ctgu.edu.cn)

College of Science and Research Institute for New Energy, China Three Gorges University, Yichang 443002, China

Department of Physics, University of Science and Technology Beijing, Beijing 100083, China.

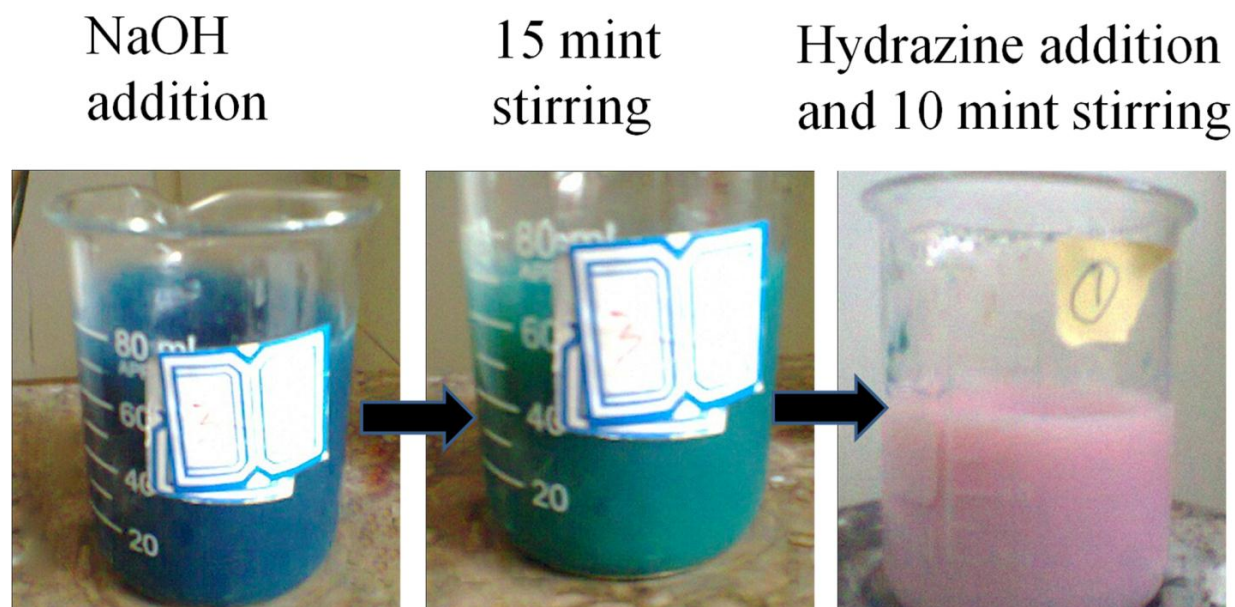

**Figure S1.** The solution of metal salts at different stages.

**Table S1.** Label and conditions of experiments

| label | NaOH | Time | Temperature |
|-------|------|------|-------------|
|       | M    | h    | °C          |
| 3DF*  | 0.75 | 16   | 120         |
| t14   | 0.75 | 14   | 120         |
| t12   | 0.75 | 12   | 120         |
| t8    | 0.75 | 8    | 120         |
| t4    | 0.75 | 4    | 120         |
| N1.00 | 1.00 | 16   | 120         |
| N0.5  | 0.5  | 16   | 120         |
| N0.25 | 0.25 | 16   | 120         |
| N0.0  | 0.00 | 16   | 120         |
| T150  | 0.75 | 7    | 150         |
| T180  | 0.75 | 7    | 180         |
| T200  | 0.75 | 7    | 200         |

T230            0.75            7            230

\*3DF=3-D flower

**Table S2. Measured and Calculated angles between different planes**

| Plane 1         | Plane 2                   | Calculated angles | Measured angle | $\Delta$ |
|-----------------|---------------------------|-------------------|----------------|----------|
| $(h_1 k_1 l_1)$ | $(h_2 k_2 l_2)$           | (Deg)             | (Deg)          |          |
| (111)           | (220)                     | 35.26             | 35.3           | 0.04     |
| (111)           | $(11\bar{1})$             | 70.52             | 71.2           | 0.5      |
| (111)           | $(11\bar{3})$             | 100.02            | 100.0          | 0.02     |
| (111)           | $(00\bar{2})$             | 125.26            | 125.1          | 0.16     |
| (111)           | $(\bar{1}\bar{1}\bar{1})$ | 180               | 179.6          | 0.04     |
| (111)           | $(\bar{2}\bar{2}\bar{0})$ | 144.74            | 144.2          | 0.54     |
| (111)           | $(\bar{1}\bar{1}\bar{1})$ | 109.47            | 108.7          | 0.77     |
| (111)           | $(\bar{1}\bar{1}\bar{3})$ | 79.98             | 79.4           | 0.58     |
| (111)           | (002)                     | 35.26             | 35.3           | 0.04     |
| (220)           | $(11\bar{1})$             | 35.26             | 35.8           | 0.54     |
| (220)           | $(11\bar{3})$             | 64.76             | 65.1           | 0.44     |
| (220)           | $(00\bar{2})$             | 90                | 90.1           | 0.10     |
| (220)           | $(\bar{1}\bar{1}\bar{1})$ | 144.74            | 144.4          | 0.34     |
| (220)           | $(\bar{2}\bar{2}\bar{0})$ | 180               | 179.6          | 0.40     |
| (220)           | $(\bar{1}\bar{1}\bar{1})$ | 144.74            | 144.0          | 0.74     |
| (220)           | $(\bar{1}\bar{1}\bar{3})$ | 115.23            | 114.1          | 1.13     |
| (220)           | (002)                     | 90.0              | 90.1           | 0.10     |

|                             |                             |        |       |      |
|-----------------------------|-----------------------------|--------|-------|------|
| (11 $\bar{1}$ )             | (1 $\bar{1}$ 3)             | 29.5   | 30.0  | 0.50 |
| (11 $\bar{1}$ )             | (00 $\bar{2}$ )             | 54.74  | 54.4  | 0.30 |
| (11 $\bar{1}$ )             | ( $\bar{1}\bar{1}\bar{1}$ ) | 109.47 | 109.2 | 0.27 |
| (11 $\bar{1}$ )             | ( $\bar{2}\bar{2}\bar{0}$ ) | 144.74 | 144.3 | 0.44 |
| (11 $\bar{1}$ )             | ( $\bar{1}\bar{1}\bar{1}$ ) | 180.0  | 179.3 | 0.7  |
| (11 $\bar{1}$ )             | ( $\bar{1}\bar{1}$ 3)       | 150.5  | 151.0 | 0.50 |
| (11 $\bar{1}$ )             | (00 $\bar{2}$ )             | 125.26 | 125.7 | 0.44 |
| (11 $\bar{3}$ )             | (00 $\bar{2}$ )             | 25.24  | 25.7  | 0.46 |
| (11 $\bar{3}$ )             | ( $\bar{1}\bar{1}\bar{1}$ ) | 79.98  | 79.7  | 0.28 |
| (11 $\bar{3}$ )             | ( $\bar{2}\bar{2}\bar{0}$ ) | 115.24 | 115.0 | 0.24 |
| (11 $\bar{3}$ )             | ( $\bar{1}\bar{1}\bar{1}$ ) | 150.5  | 151.0 | 0.50 |
| (11 $\bar{3}$ )             | ( $\bar{1}\bar{1}$ 3)       | 180.0  | 179.4 | 0.6  |
| (11 $\bar{3}$ )             | (00 $\bar{2}$ )             | 154.76 | 154.0 | 0.76 |
| (00 $\bar{2}$ )             | ( $\bar{1}\bar{1}\bar{1}$ ) | 54.74  | 54.4  | 0.34 |
| (00 $\bar{2}$ )             | ( $\bar{2}\bar{2}\bar{0}$ ) | 90     | 90.5  | 0.5  |
| (00 $\bar{2}$ )             | ( $\bar{1}\bar{1}\bar{1}$ ) | 125.26 | 125.2 | 0.06 |
| (00 $\bar{2}$ )             | ( $\bar{1}\bar{1}$ 3)       | 154.76 | 154.9 | 0.14 |
| (00 $\bar{2}$ )             | (00 $\bar{2}$ )             | 180.0  | 180.1 | 0.1  |
| ( $\bar{1}\bar{1}\bar{1}$ ) | ( $\bar{2}\bar{2}\bar{0}$ ) | 35.26  | 35.1  | 0.16 |
| ( $\bar{1}\bar{1}\bar{1}$ ) | ( $\bar{1}\bar{1}\bar{1}$ ) | 70.53  | 70.8  | 0.27 |
| ( $\bar{1}\bar{1}\bar{1}$ ) | ( $\bar{1}\bar{1}$ 3)       | 100    | 99.6  | 0.4  |
| ( $\bar{1}\bar{1}\bar{1}$ ) | (00 $\bar{2}$ )             | 125.26 | 124.8 | 0.46 |

|                       |                       |       |      |      |
|-----------------------|-----------------------|-------|------|------|
| ( $\bar{2}\bar{2}0$ ) | ( $\bar{1}\bar{1}1$ ) | 35.26 | 35.8 | 0.54 |
| ( $\bar{2}\bar{2}0$ ) | ( $\bar{1}\bar{1}3$ ) | 64.76 | 65.3 | 0.54 |
| ( $\bar{2}\bar{2}0$ ) | (002)                 | 90    | 89.1 | 0.90 |
| ( $\bar{1}\bar{1}1$ ) | ( $\bar{1}\bar{1}3$ ) | 29.49 | 29.2 | 0.29 |
| ( $\bar{1}\bar{1}1$ ) | (002)                 | 54.74 | 54.2 | 0.54 |
| ( $\bar{1}\bar{1}3$ ) | (002)                 | 25.24 | 24.3 | 0.96 |

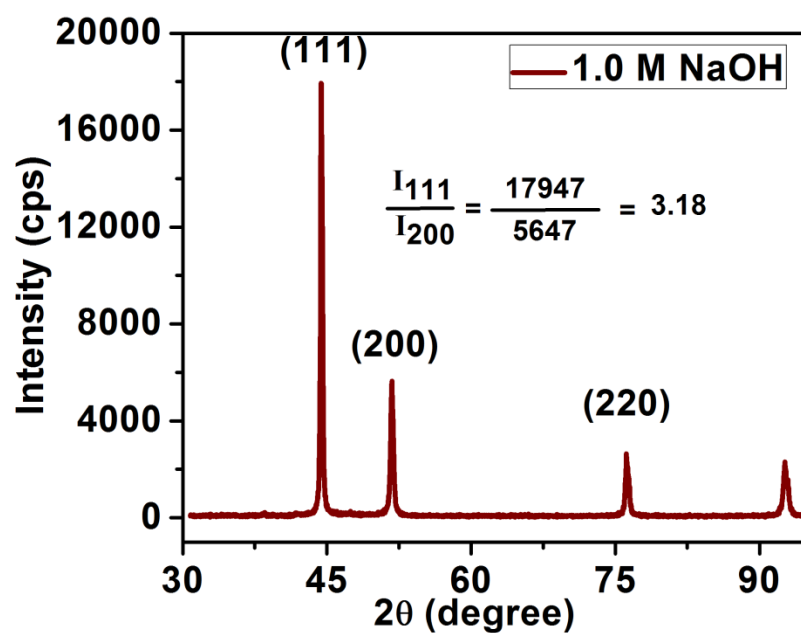

**Figure S2.** XRD pattern of sample prepared at 1.0 M NaOH addition. The intensity ratio  $I_{111}/I_{200}$  is found to be 3.18.
